# Supplementary material for: The molecular mechanism of temperature-dependent p53C phase separation accelerated by oncogenic mutations: insights from all-atom and coarse-grained molecular dynamics simulations
Source: Royal Society of Chemistry journal article supplement (doi:10.1039/d5cp03974f), 2026-01-01
Supplement: d5cp03974f1.pdf [file d5cp03974f1.pdf]

# The Molecular Mechanism of Temperature-dependent p53C Phase Separation Accelerated by Oncogenic Mutations: Insights from All-atom and Coarse-grained Molecular Dynamics Simulations

Zhifa Duan<sup>a,b,±</sup>, Yi Song<sup>a,b,±</sup>, Huanhuan Ruan<sup>a,b</sup>, Tianjing Guo<sup>b</sup> and Jiangtao Lei<sup>a,b,\*</sup>

<sup>a</sup>Department of Physics, School of Physics and Materials Science, Nanchang University, Xuefu Avenue 999, Nanchang City 330031, China

<sup>b</sup>Institute of Space Science and Technology, Nanchang University, Xuefu Avenue 999, Nanchang City 330031, China

The authors declare no competing financial interest.

\*Corresponding author: Jiangtao Lei, E-mail: [jiangtaolei@ncu.edu.cn](mailto:jiangtaolei@ncu.edu.cn);

± Contributed equally

**This material contains eleven supplemental figures.**

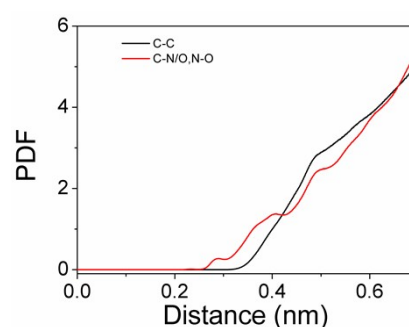

Figure S1, The PDF of distance among heavy atoms.

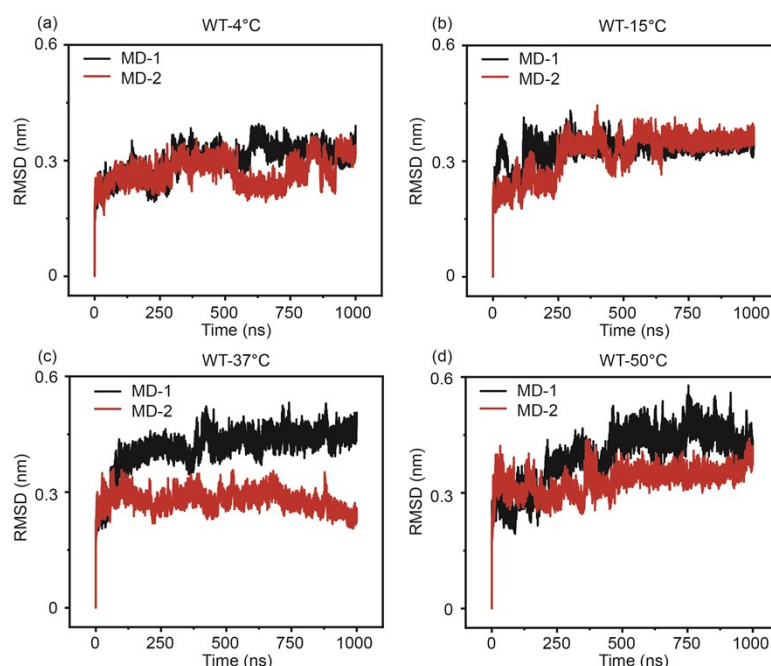

Figure S2. Time evolution of backbone root-mean-square-deviation (RMSD) for WT.

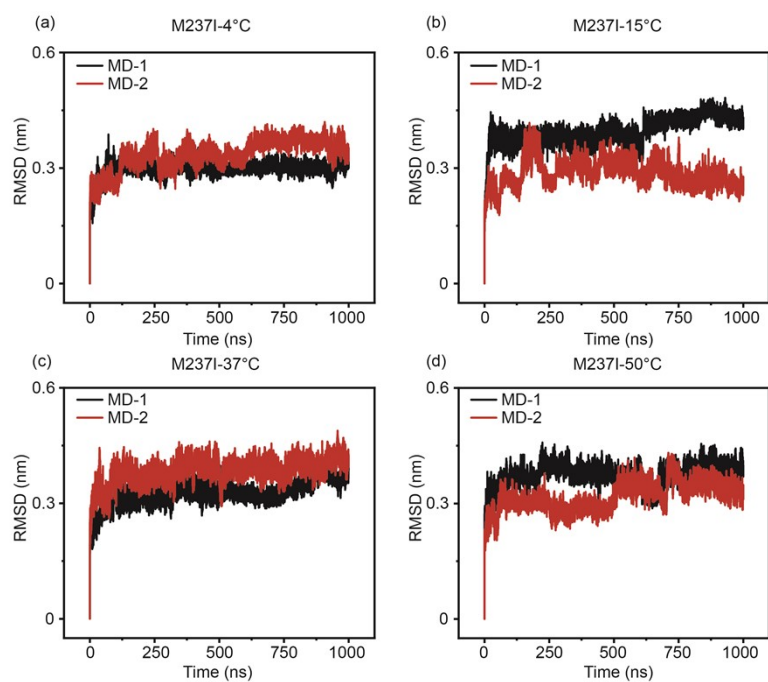

Figure S3. Time evolution of backbone root-mean-square-deviation (RMSD) for M237I.

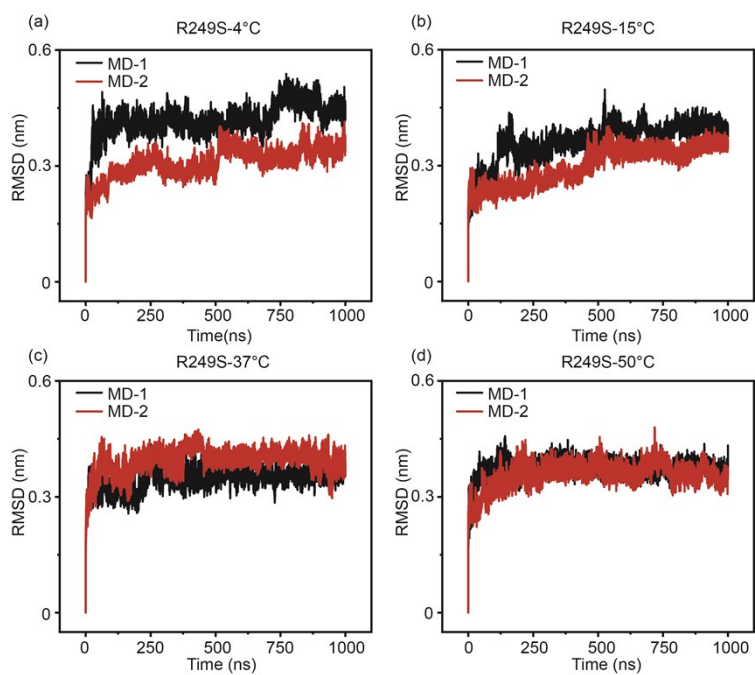

Figure S4. Time evolution of backbone root-mean-square-deviation (RMSD) for R249S.

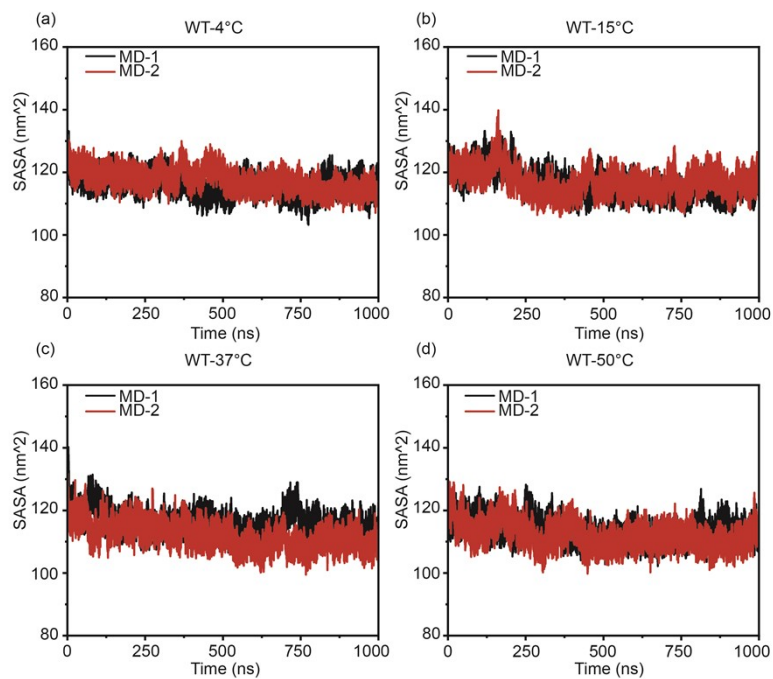

Figure S5. Time evolution of protein solvent-accessible surface area (SASA) for WT.

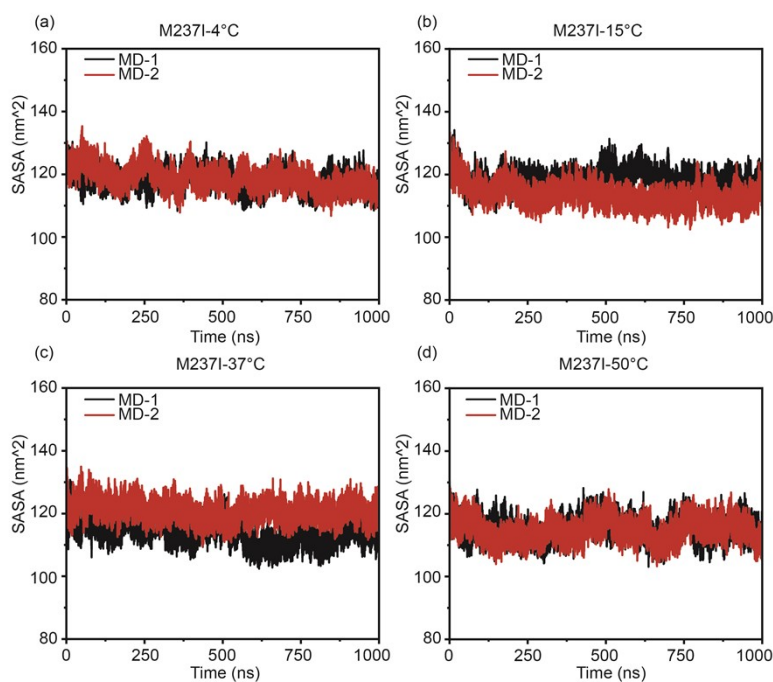

Figure S6. Time evolution of protein solvent-accessible surface area (SASA) for M237I.

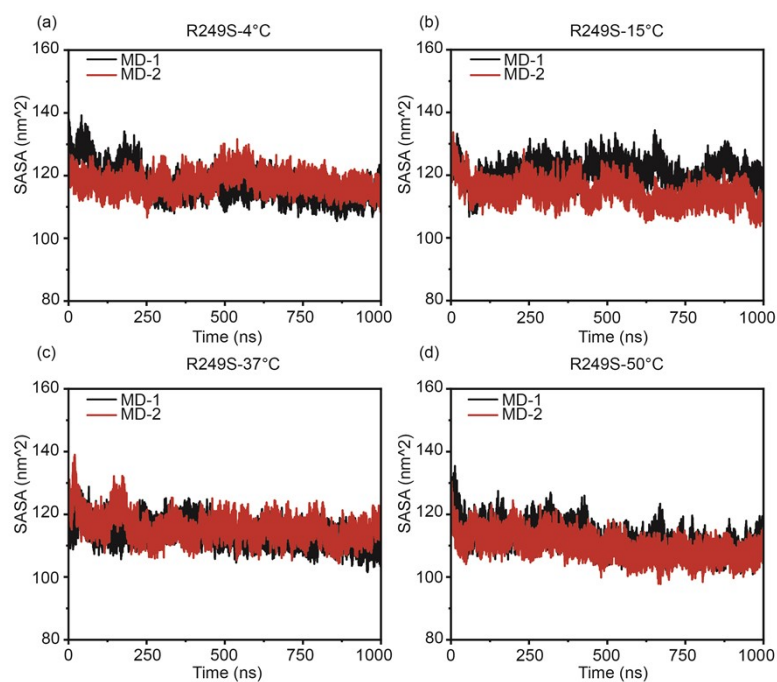

Figure S7. Time evolution of protein solvent-accessible surface area (SASA) for R249S.

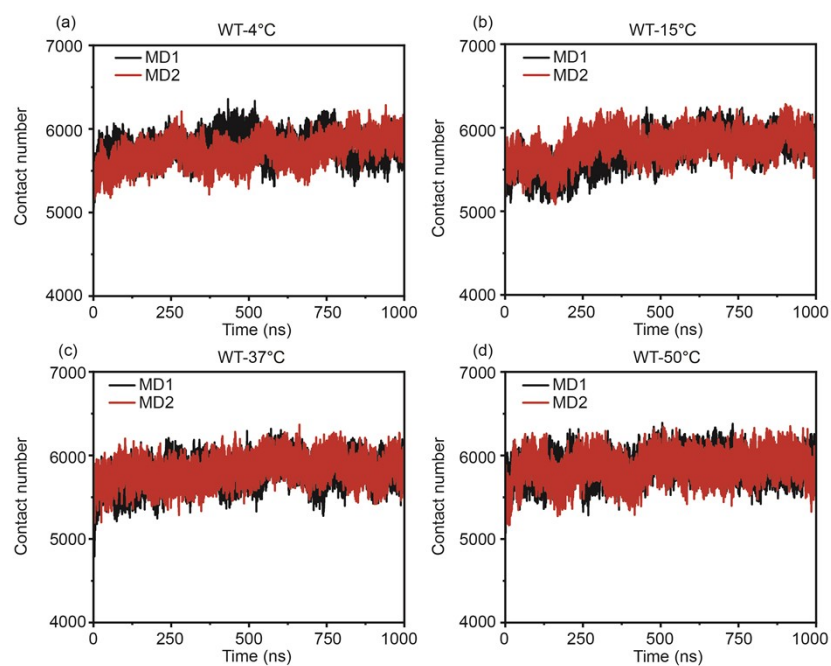

Figure S8. Time evolution of total residue-residue contact number for WT.

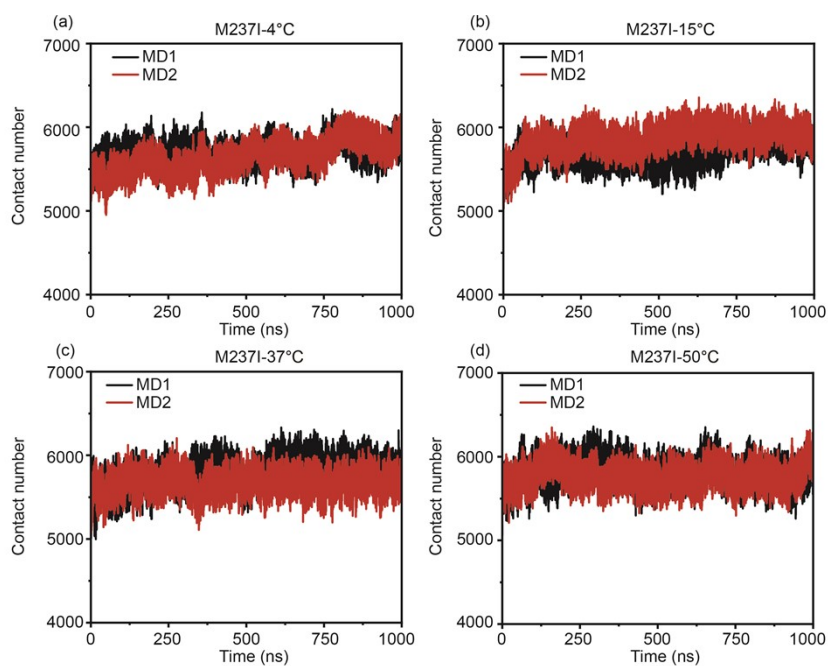

Figure S9. Time evolution of total residue-residue contact number for M237I.

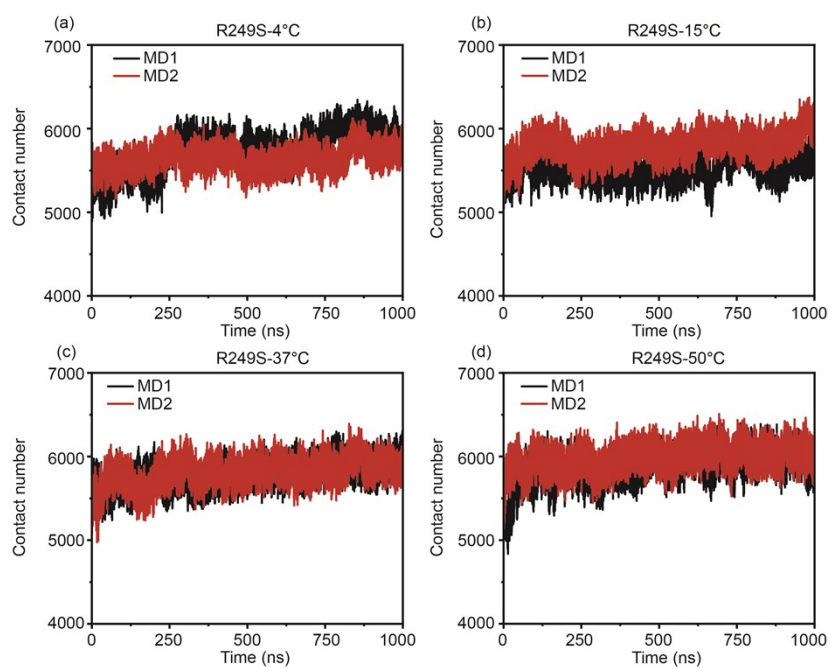

Figure S10. Time evolution of total residue-residue contact number for R249S.

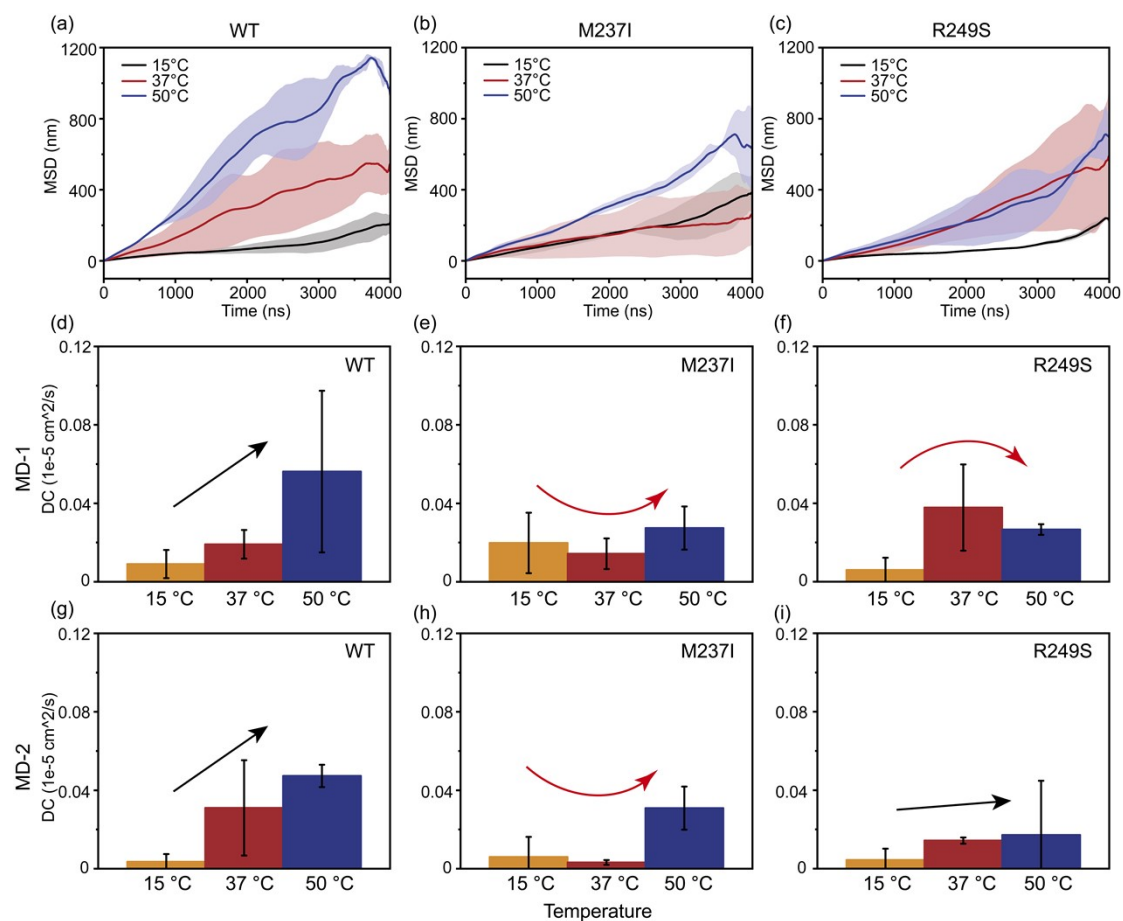

Figure S11. Time evolution of the total mean-square displacement (MSD) of the proteins in the (a) wild-type (WT), (b) M237I, and (c) R249S systems; and the diffusion coefficients (DC) derived from two independent molecular dynamics (MD) groups for the three systems (d–i), as obtained from coarse-grained (CG) simulations.
